# Supplementary material for: Green synthesis of new adamantane-containing dihydropyrimidine derivatives as potential anticancer agents
Source: Royal Society of Chemistry journal article supplement (doi:10.1039/d5ra00284b), 2025-01-01

**Green synthesis of new adamantane-containing dihydropyrimidine derivatives as  
potential anticancer agents**

Adeleh Moshtaghi Zonouz<sup>a\*</sup>, Mina Abkar Aras<sup>a</sup>, Nahideh Jafari<sup>b</sup>, Zahra Rezaei<sup>a</sup>, Hamed Hamishehkar<sup>c\*</sup>

<sup>a</sup>*Department of Chemistry, Faculty of Science, Azarbaijan Shahid Madani University, Tabriz- Iran.*

<sup>b</sup>*Faculty of Chemical and Petroleum Engineering, University of Tabriz, Tabriz, Iran*

<sup>c</sup>*Drug Applied Research Center, Tabriz University of Medical Sciences, Tabriz, Iran.*

Corresponding authors:

Adeleh Moshtaghi Zonouz: [adelehmz@yahoo.com](mailto:adelehmz@yahoo.com).

Hamed Hamishehkar: [hamishehkarh@tbzmed.ac.ir](mailto:hamishehkarh@tbzmed.ac.ir); [Hamishehkar.hamed@gmail.com](mailto:Hamishehkar.hamed@gmail.com).

## FTIR 5-(1-adamantylcarbamoyl) –6-methyl-4-phenyl-3,4-dihydropyrimidin-2(1H)-thione [IIa]

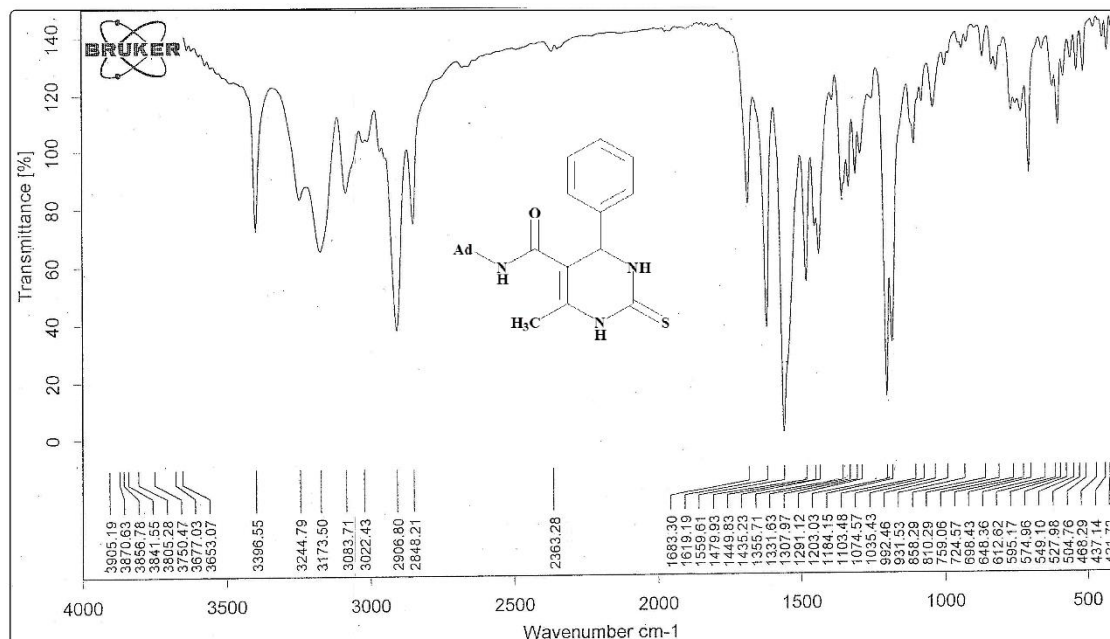

## <sup>1</sup>HNMR of 5-(1-adamantylcarbamoyl) –6-methyl-4-phenyl-3,4-dihydropyrimidin-2(1H)-thione [IIa]

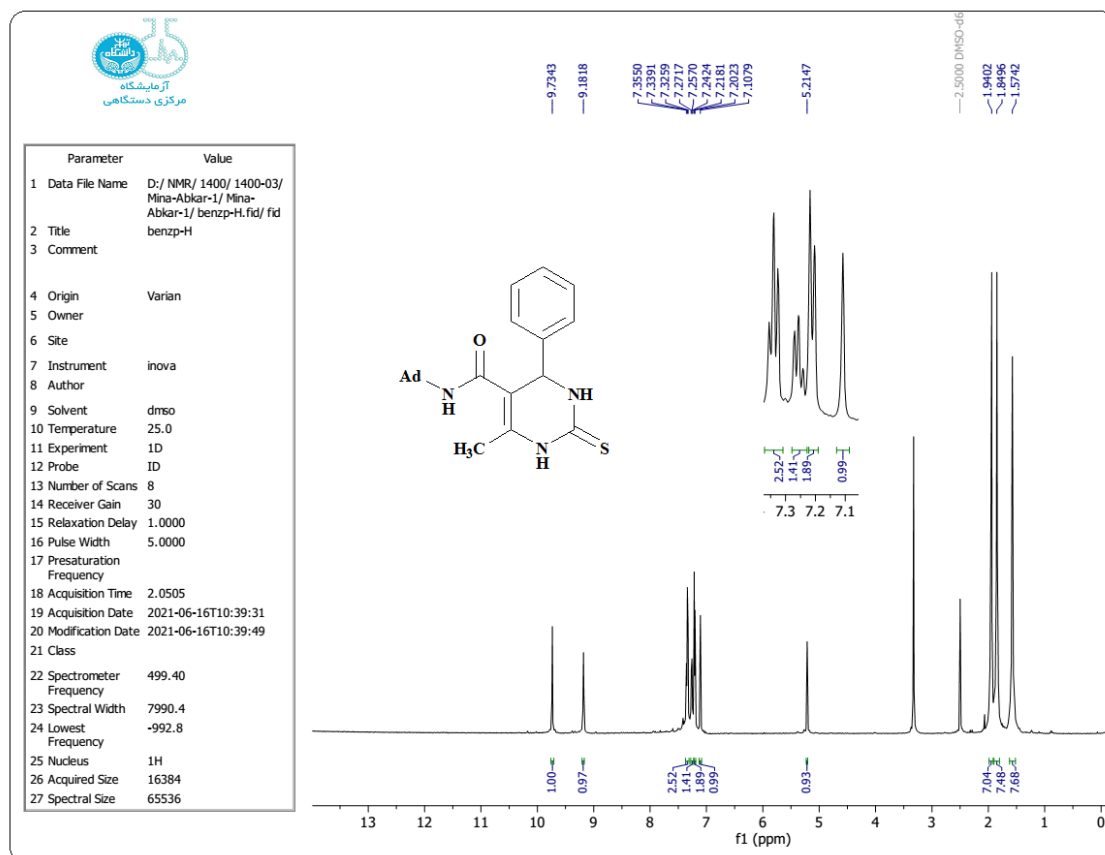

# <sup>13</sup>CNMR of 5-(1-adamantylcarbamoyl)-6-methyl-4-phenyl-3,4-dihydropyrimidin-2(1H)-thione [IIa]

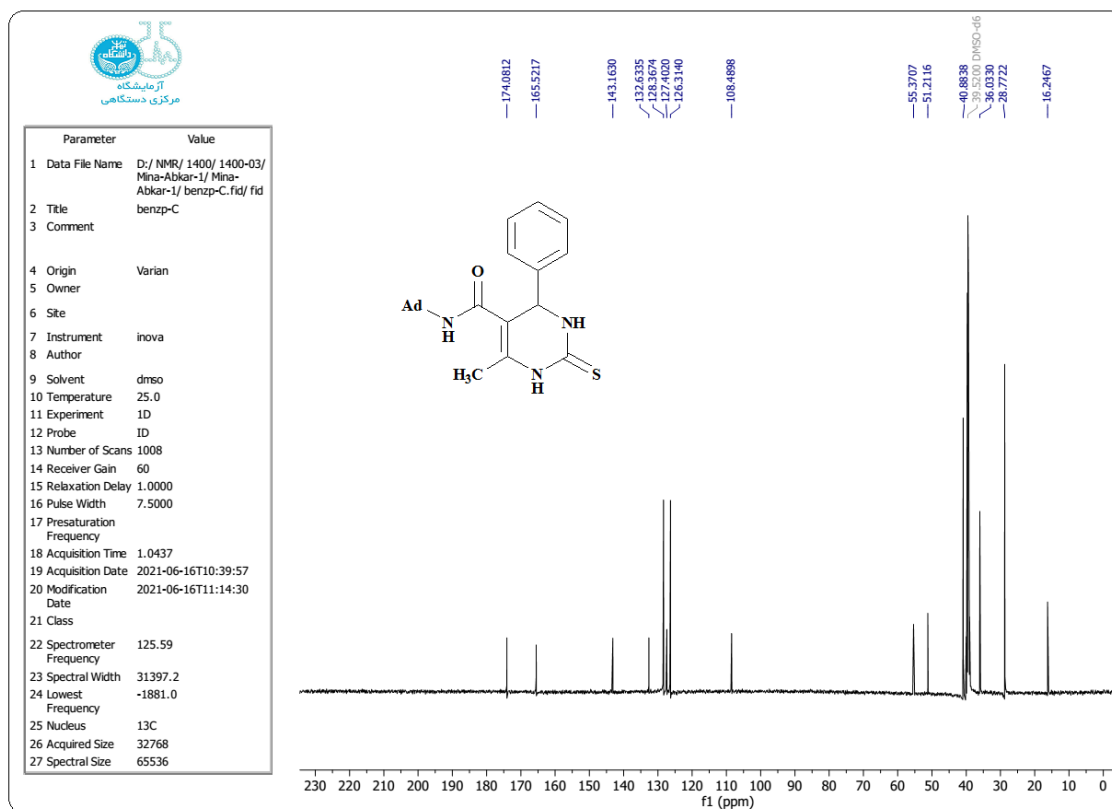

**FTIR of 5-(1-adamantylcarbamoyl) –6-methyl-4-(2-methylphenyl) –3,4-dihydropyrimidin-2(1H)-thione [Iib]**

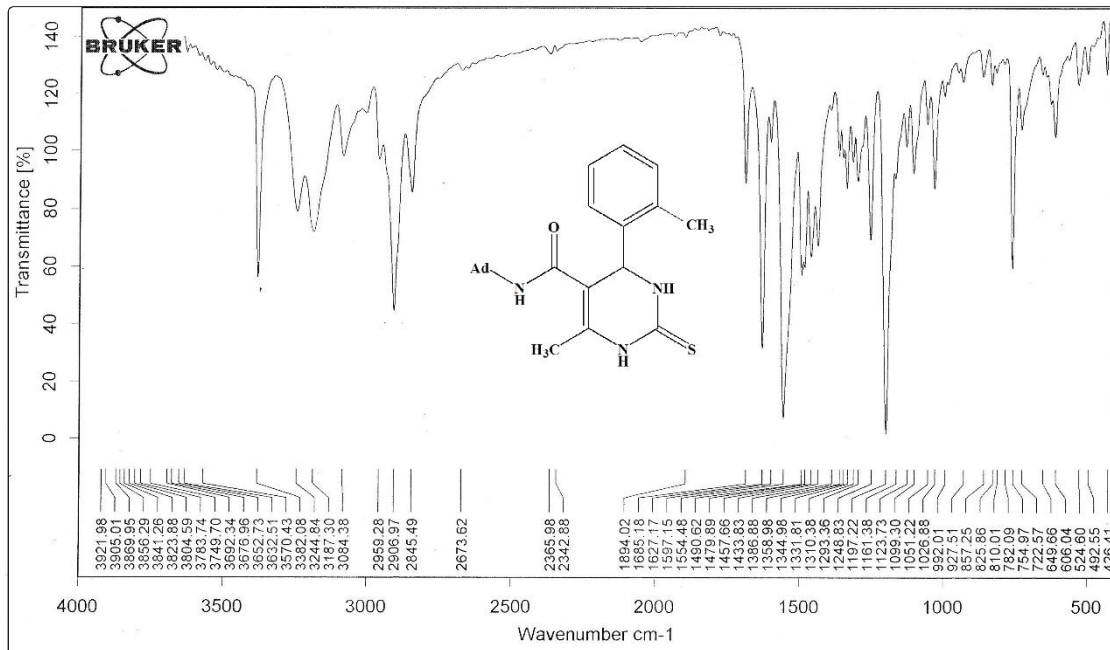

**<sup>1</sup>HNMR of 5-(1-adamantylcarbamoyl) –6-methyl-4-(2-methylphenyl) –3,4-dihydropyrimidin-2(1H)-thione [Iib]**

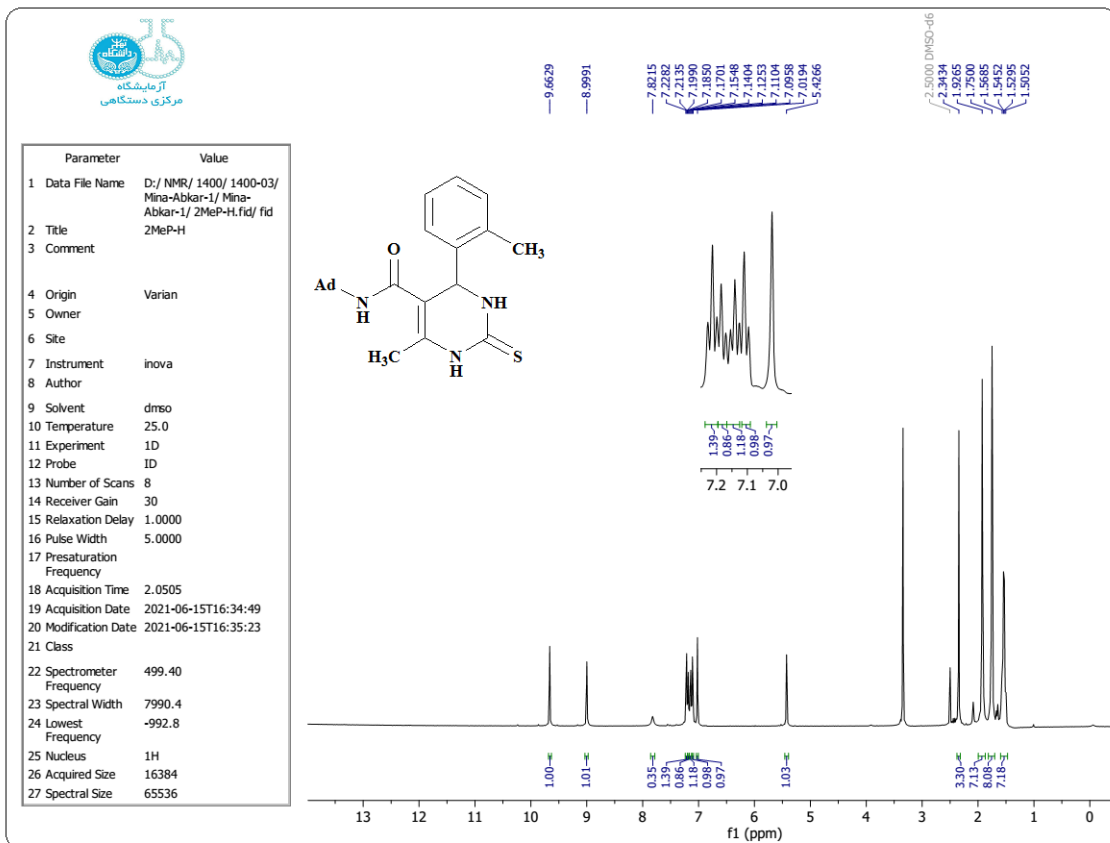

**<sup>13</sup>CNMR of 5-(1-adamantylcarbamoyl) –6-methyl-4-(2-methylphenyl) –3,4-dihydropyrimidin-2(1H)-thione [Iib]**

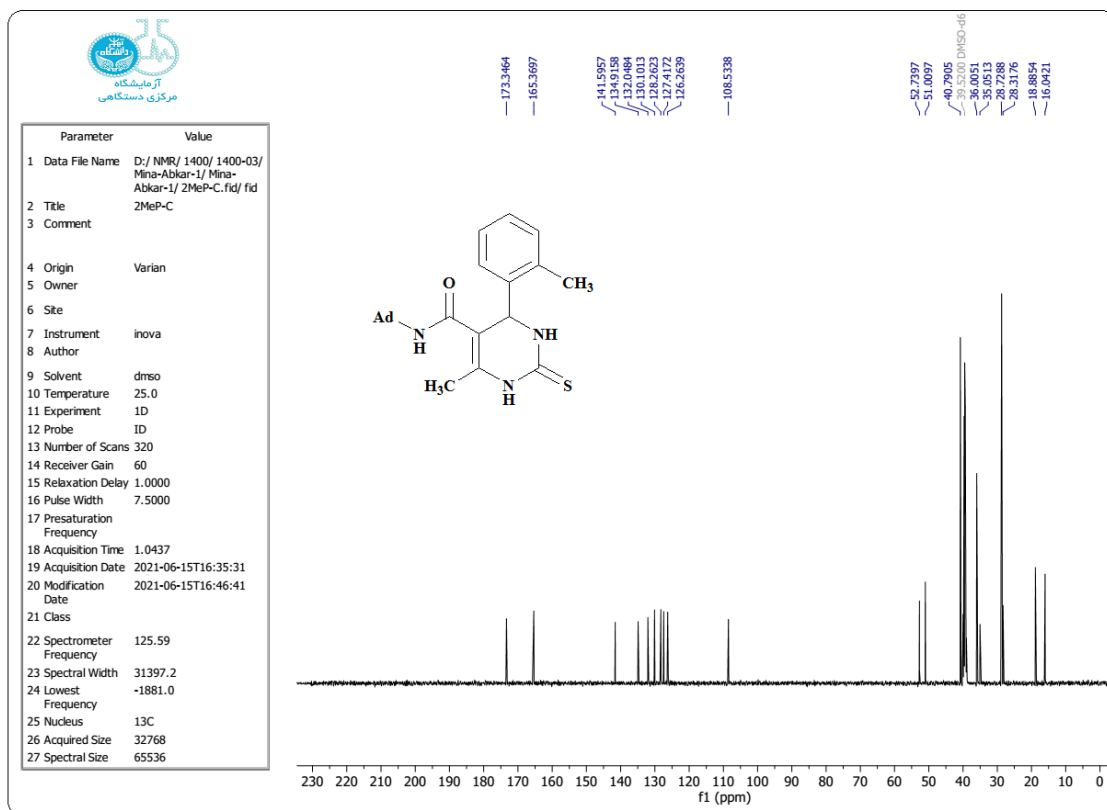

## FTIR of 5-(1-adamantylcarbamoyl)-6-methyl-4-(3-methylphenyl)-3,4-dihydropyrimidin-2(1H)-thione [Ic]

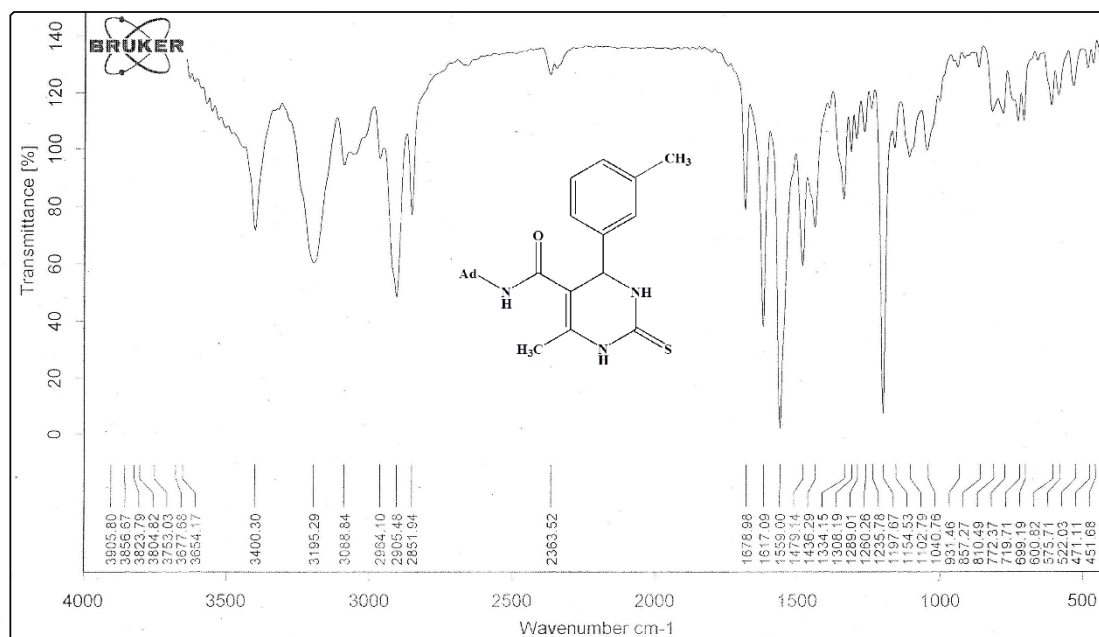

## <sup>1</sup>H NMR of 5-(1-adamantylcarbamoyl)-6-methyl-4-(3-methylphenyl)-3,4-dihydropyrimidin-2(1H)-thione [Ic]

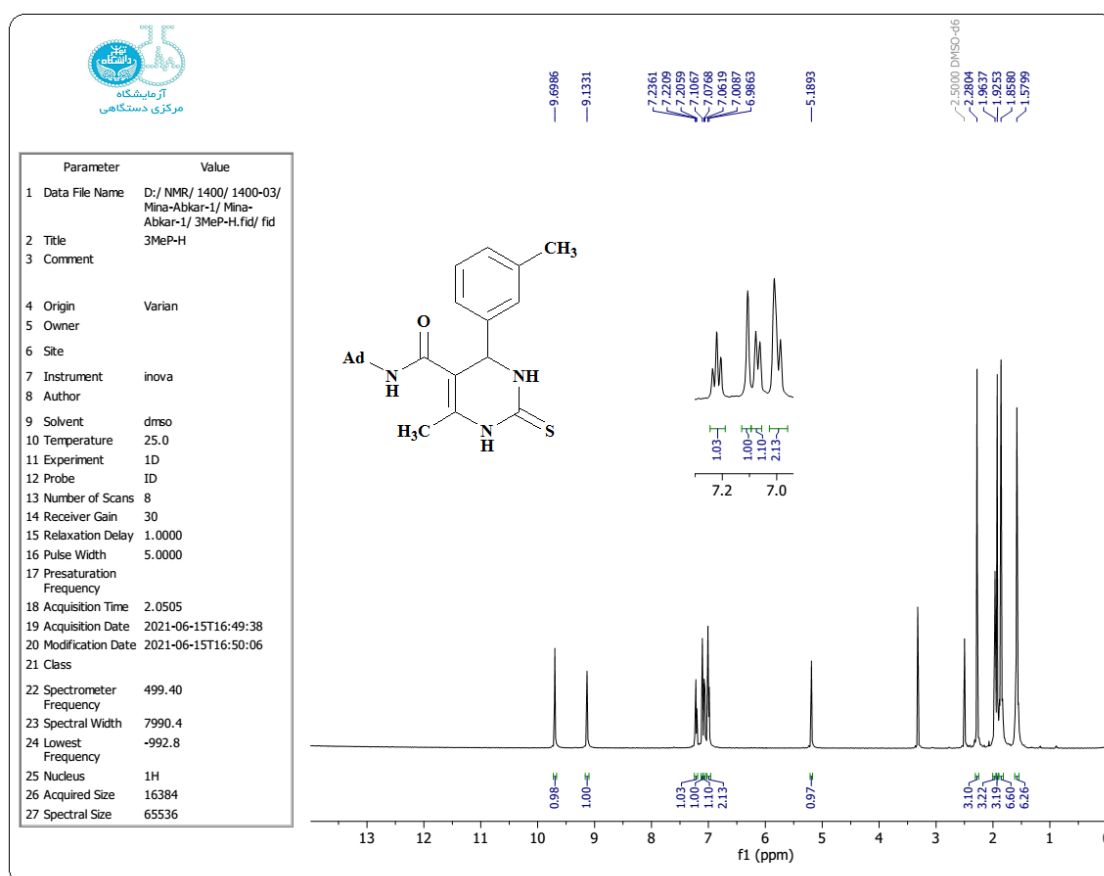

**<sup>13</sup>CNMR of 5-(1-adamantylcarbonyl)-6-methyl-4-(3-methylphenyl)-3,4-dihydropyrimidin-2(1H)-thione [IIc]**

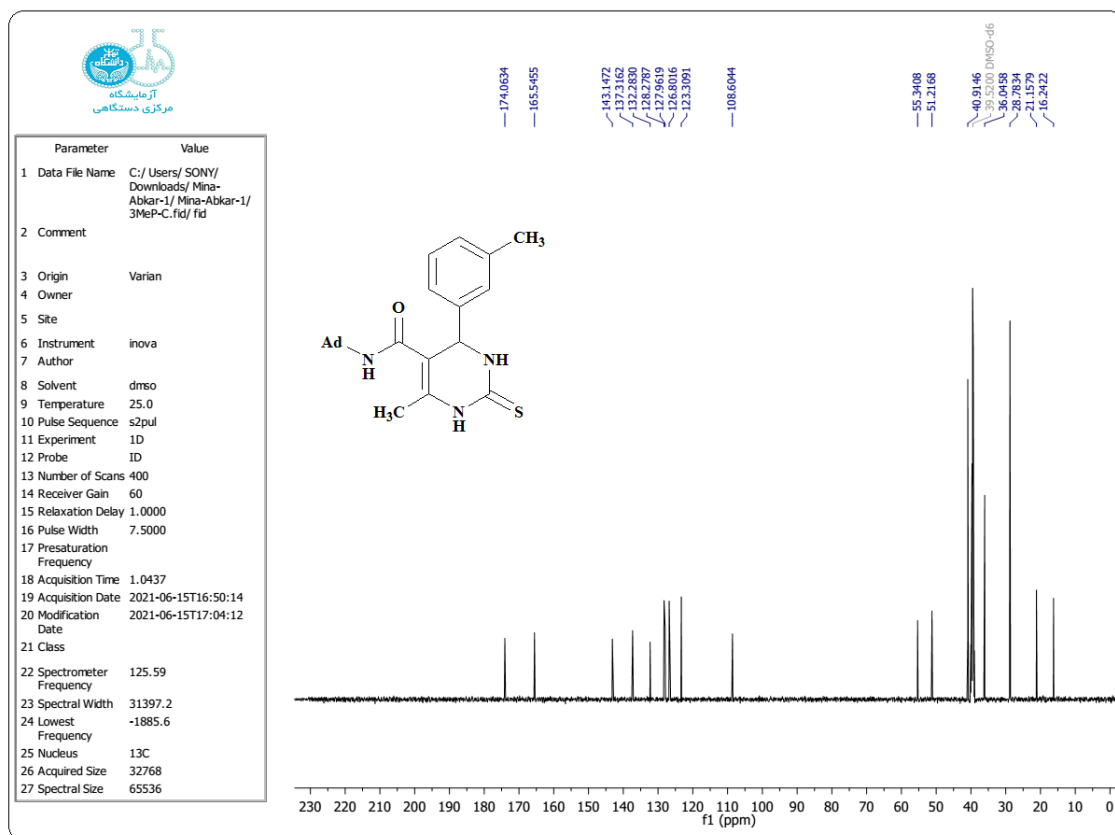

## FTIR of 5-(1-adamantylcarbamoyl) –6-methyl-4-(4-methylphenyl) –3,4-dihydropyrimidin-2(1H)-thione [IIId]

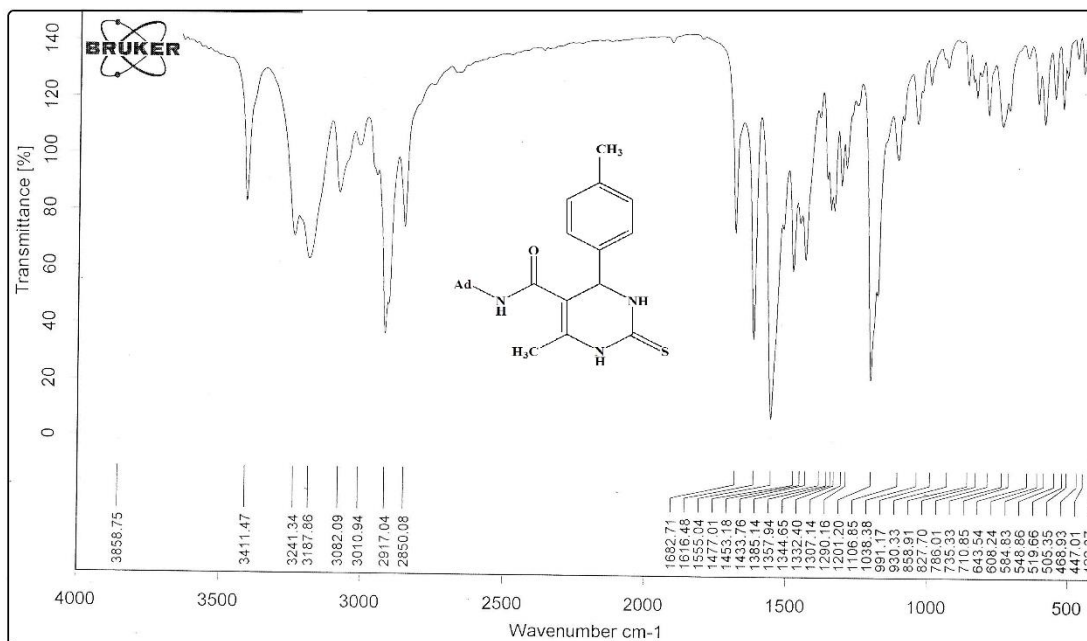

## <sup>1</sup>HNMR of 5-(1-adamantylcarbamoyl) –6-methyl-4-(4-methylphenyl) –3,4-dihydropyrimidin-2(1H)-thione [IIId]

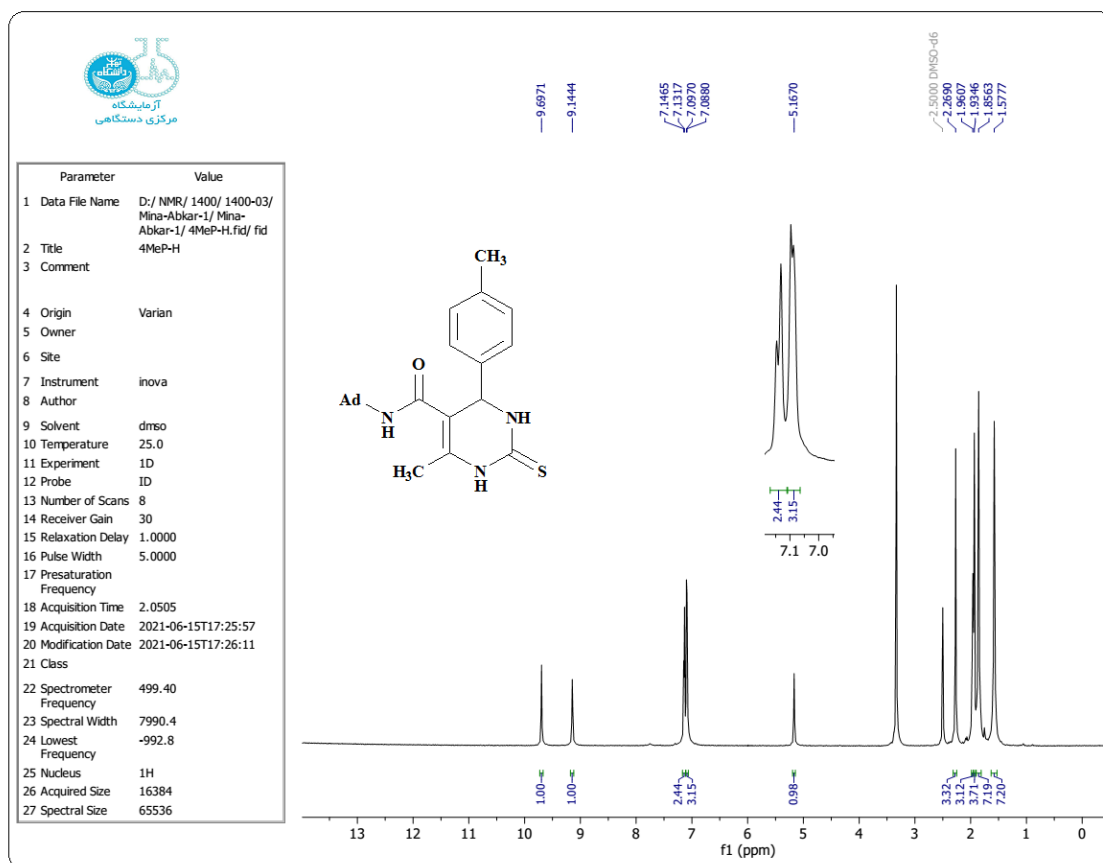



**<sup>13</sup>CNMR of 5-(1-adamantylcarbamoyl) –6-methyl-4-(4-methylphenyl) –3,4-dihydropyrimidin-2(1H)-thione [IId]**

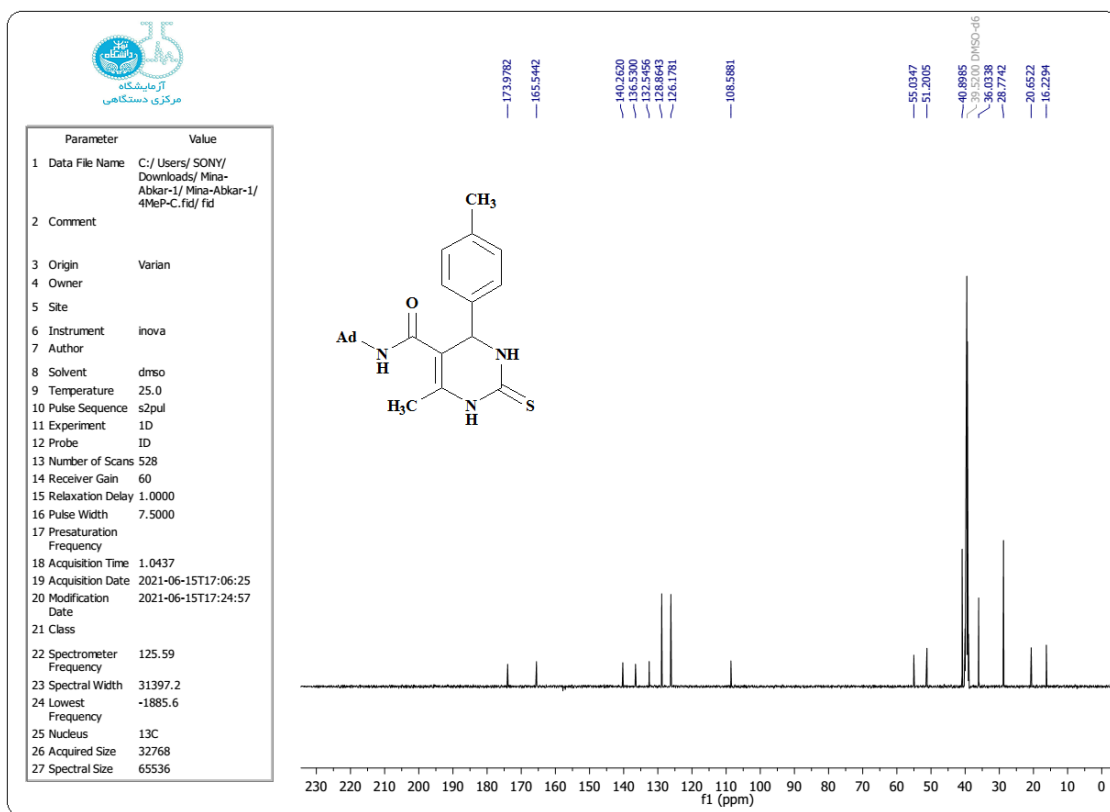

**FTIR of 5-(1-adamantylcarbamoyl) –6-methyl-4-(3-methoxyphenyl) –3,4-dihydropyrimidin-2(1H)-thione [Ile]**

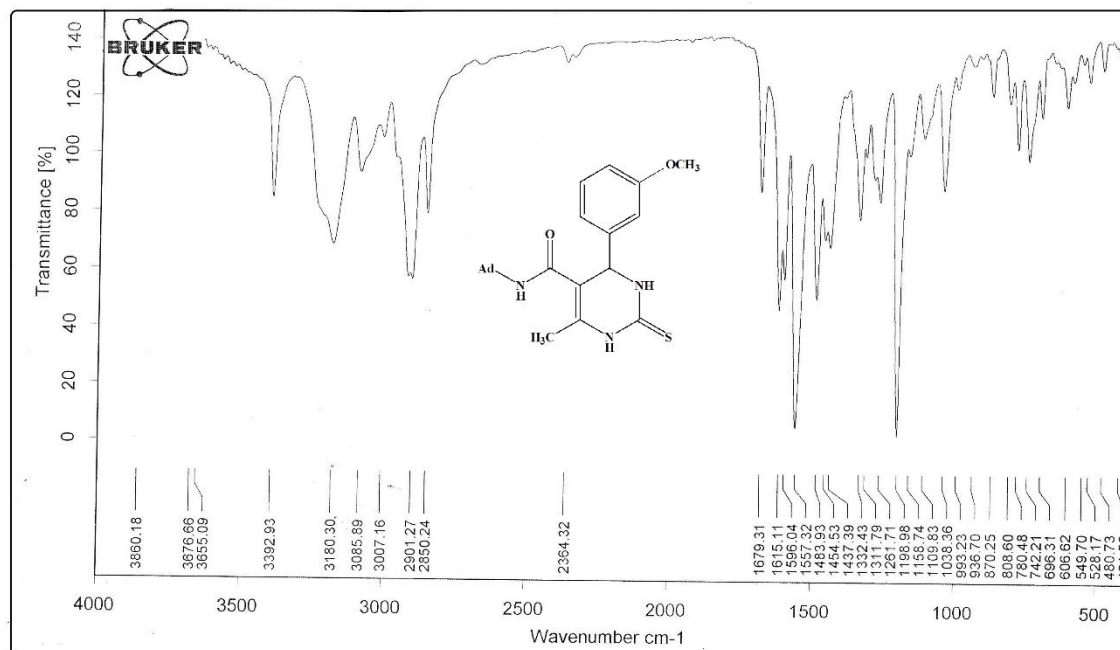

**<sup>1</sup>HNMR of 5-(1-adamantylcarbamoyl) –6-methyl-4-(3-methoxyphenyl) –3,4-dihydropyrimidin-2(1H)-thione [Ile]**

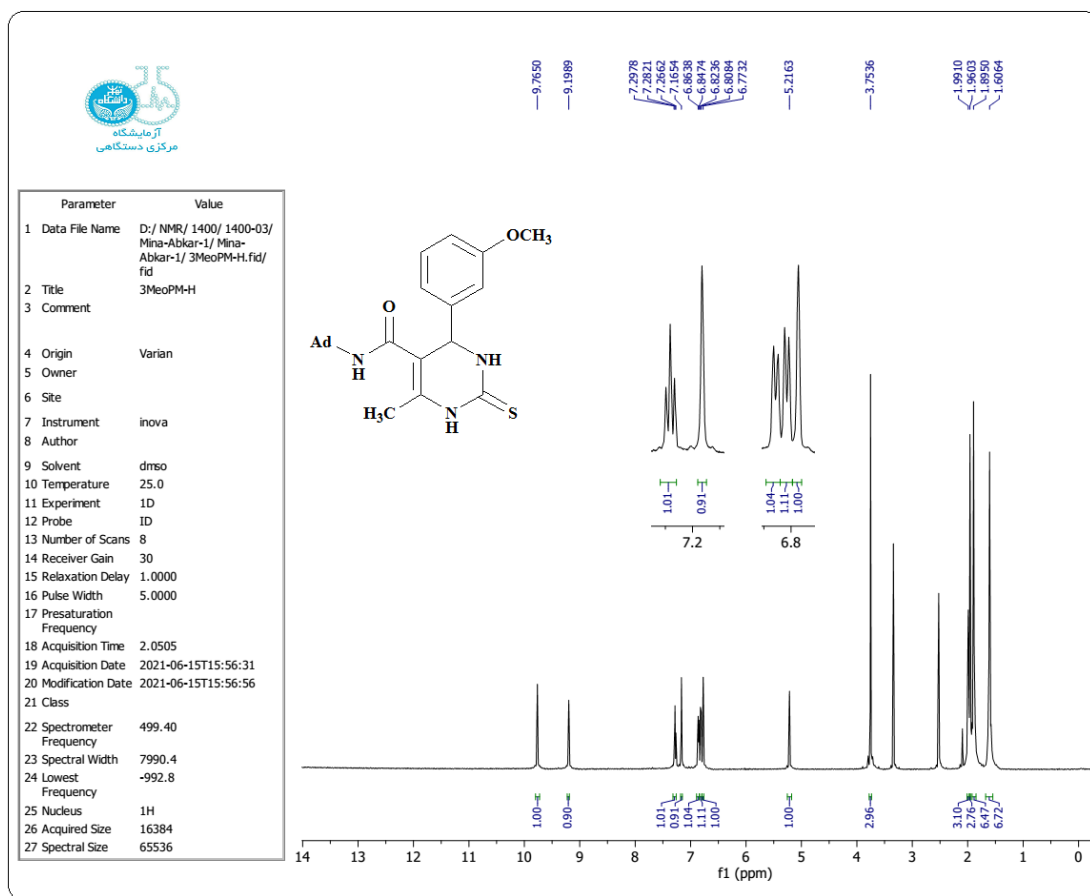

**<sup>13</sup>CNMR of 5-(1-adamantylcarbamoyl) –6-methyl-4-(3-methoxyphenyl) –3,4-dihydropyrimidin-2(1H)-thione [IIe]**

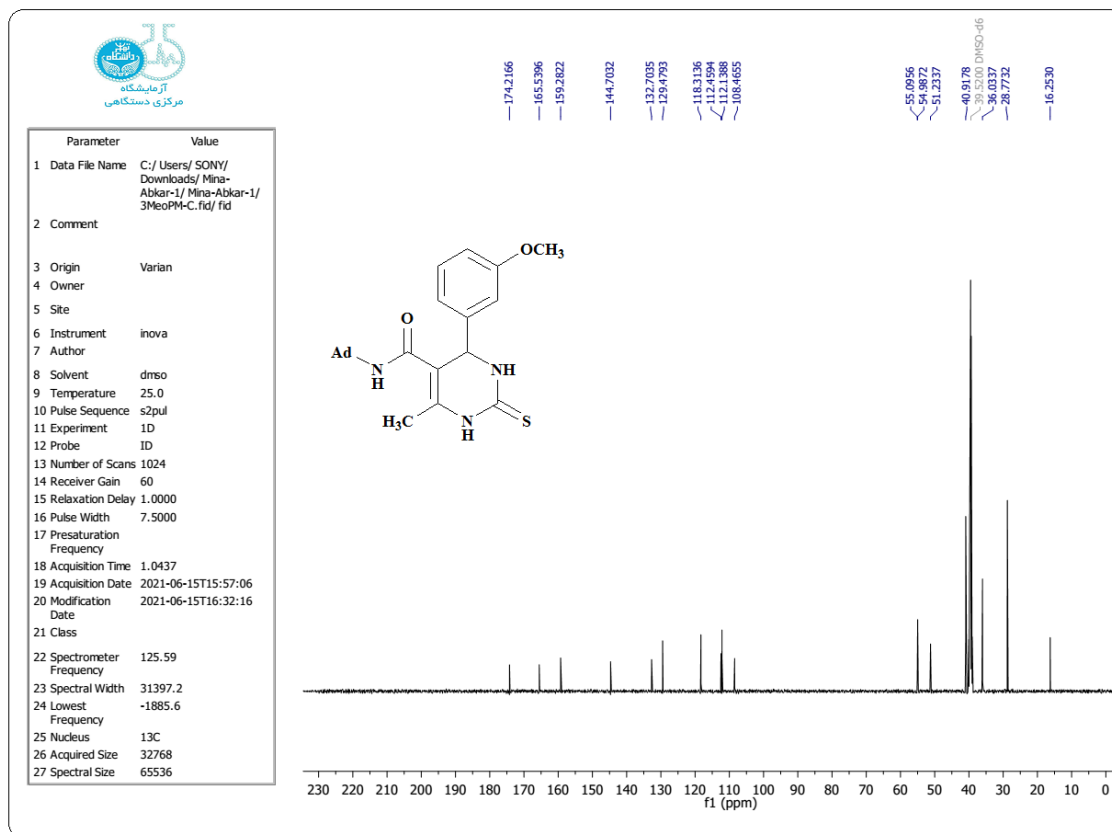

**FTIR of 13-(1-adamantylcarbamoyl) –9-methyl-11-thioxo-8-oxa-10,12-diazatricyclo [7.3.1.0<sup>2,7</sup>] trideca-2,4,6-triene [IIf]**

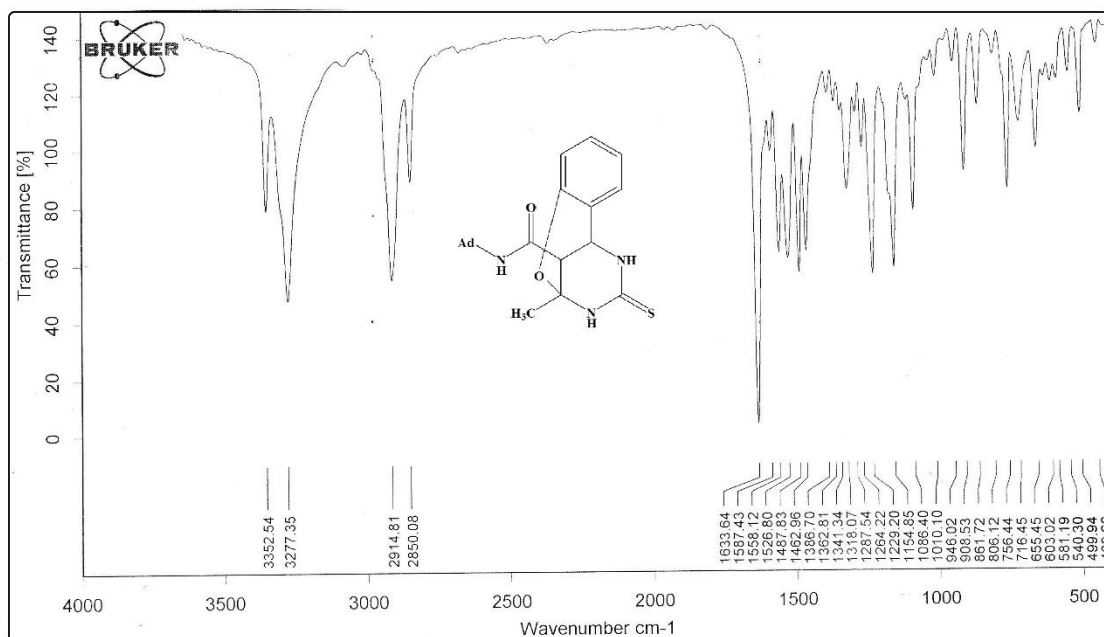

**<sup>1</sup>HNMR of 13-(1-adamantylcarbamoyl) –9-methyl-11-thioxo-8-oxa-10,12-diazatricyclo [7.3.1.0<sup>2,7</sup>] trideca-2,4,6-triene [IIf]**

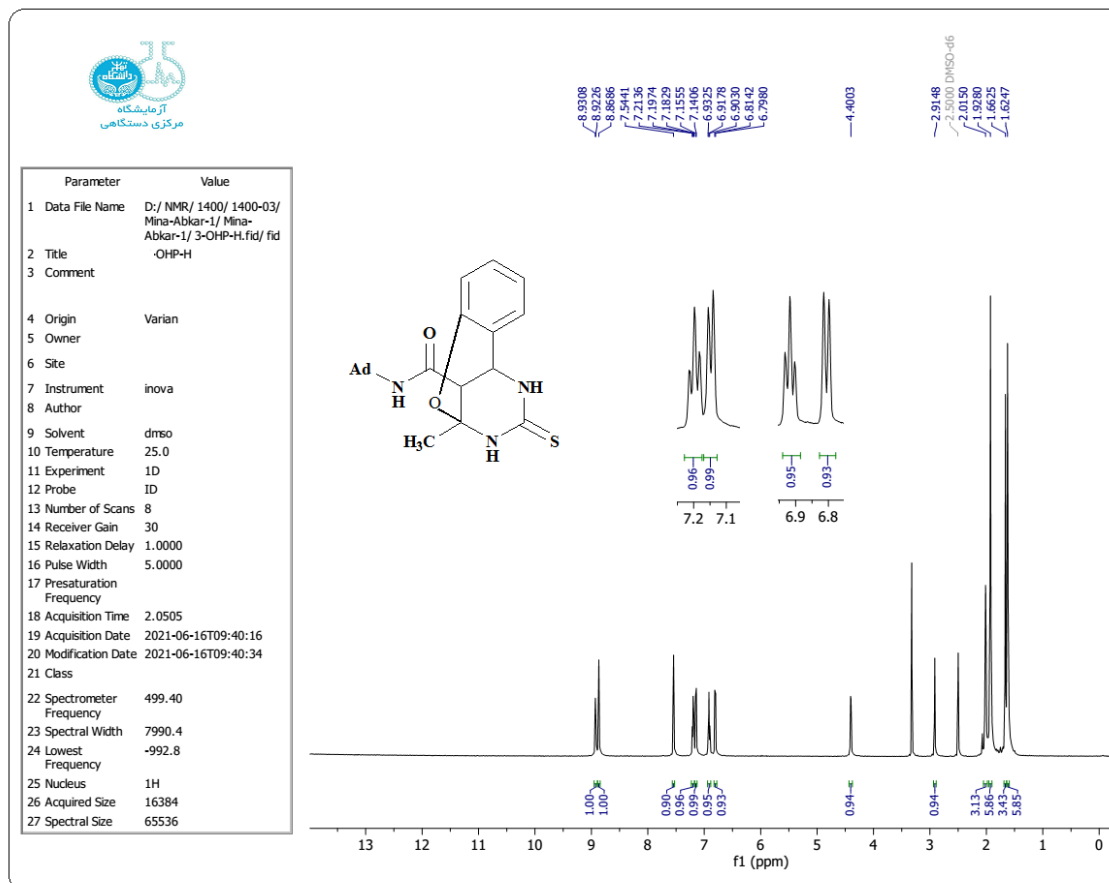

**<sup>13</sup>CNMR of 13-(1-adamantylcarbamoyl) -9-methyl-11-thioxo-8-oxa-10,12-diazatricyclo [7.3.1.0<sup>2,7</sup>] trideca-2,4,6-triene [IIf]**

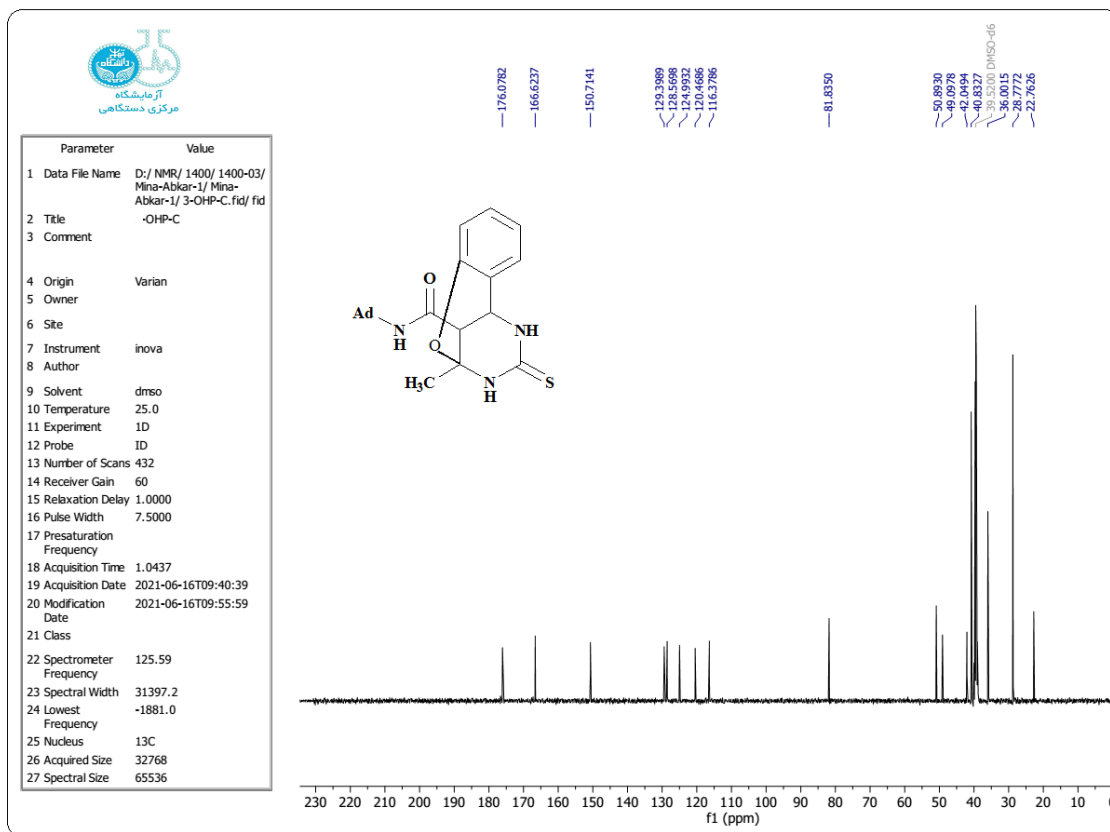

### FTIR of 5-(1-adamantylcarbamoyl)-6-methyl-4-(3-hydroxyphenyl)-3,4-dihydropyrimidin-2(1H)-thione [IIh]

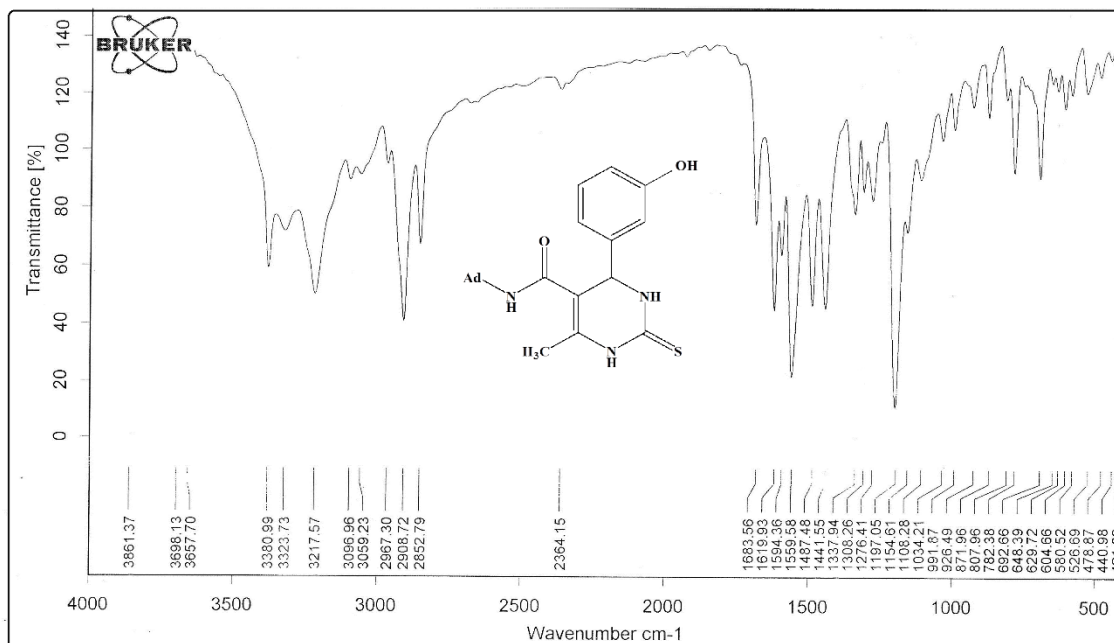

### <sup>1</sup>HNMR of 5-(1-adamantylcarbamoyl)-6-methyl-4-(3-hydroxyphenyl)-3,4-dihydropyrimidin-2(1H)-thione [IIh]

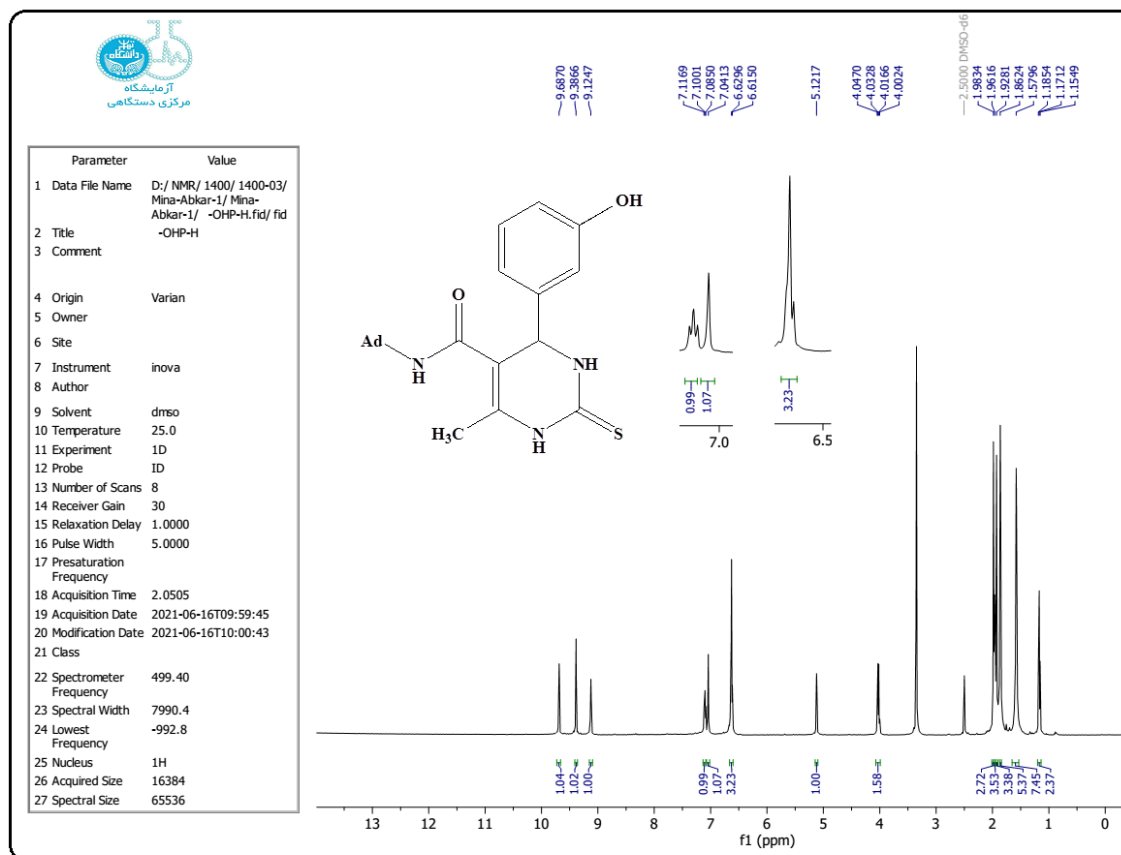

**<sup>13</sup>CNMR of 5-(1-adamantylcarbamoyl)-6-methyl-4-(3-hydroxyphenyl)-3,4-dihydropyrimidin-2(1H)-thione [IIh]**

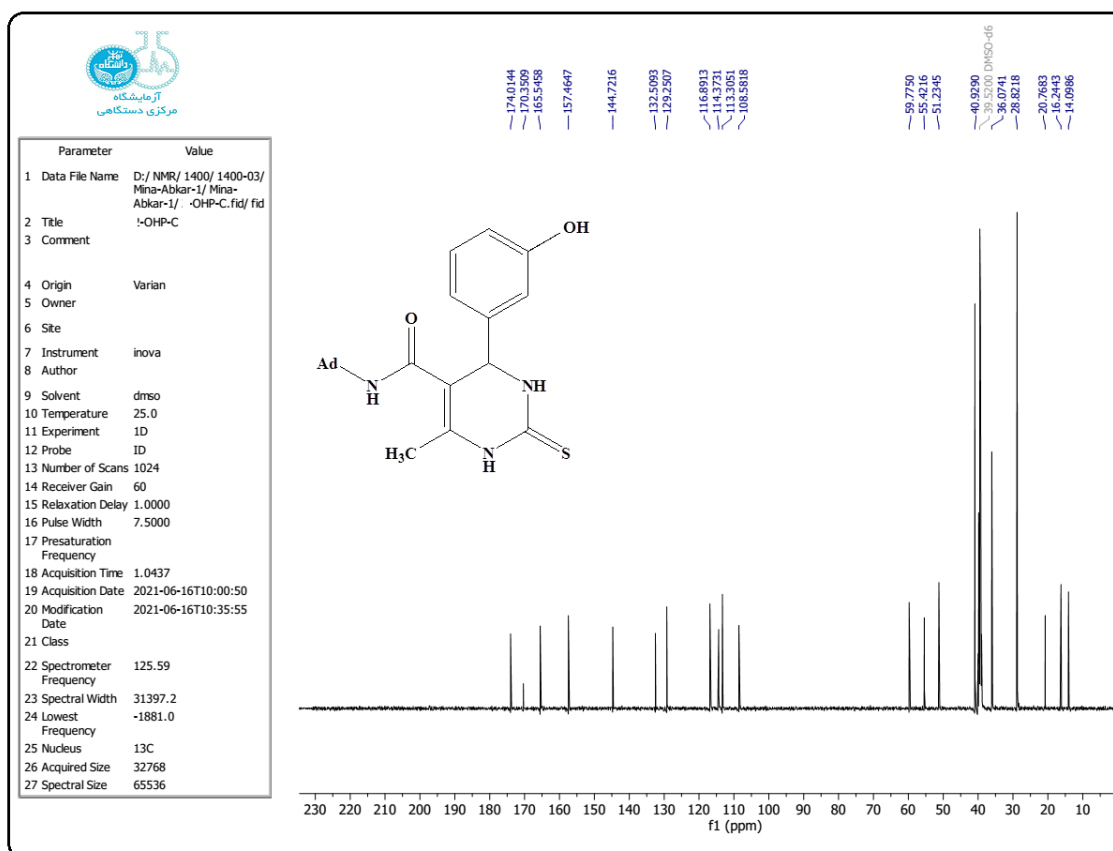

**FTIR of 5-(1-adamantylcarbamoyl)-6-methyl-4-(3-nitrophenyl)-3,4-dihydropyrimidin-2(1H)-thione [Iii]**

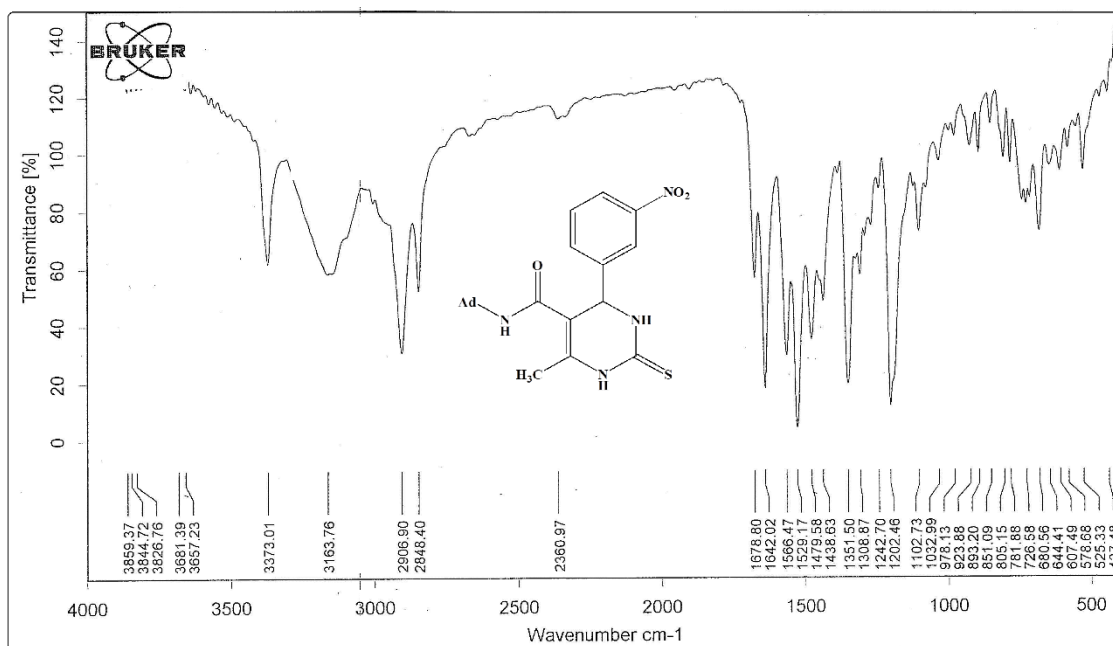

**<sup>1</sup>HNMR of 5-(1-adamantylcarbamoyl)-6-methyl-4-(3-nitrophenyl)-3,4-dihydropyrimidin-2(1H)-thione [Iii]**

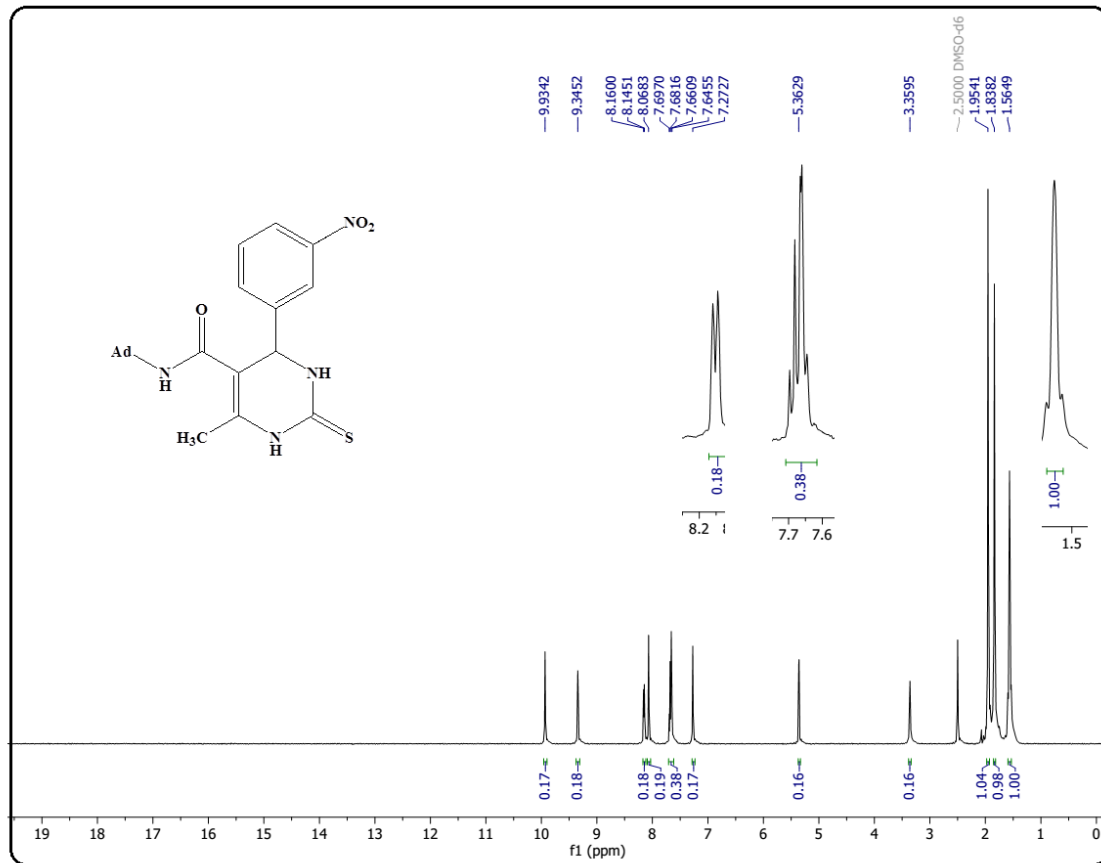



**<sup>13</sup>CNMR of 5-(1-adamantylcarbamoyl)-6-methyl-4-(3-nitrophenyl)-3,4-dihydropyrimidin-2(1H)-thione [III]**

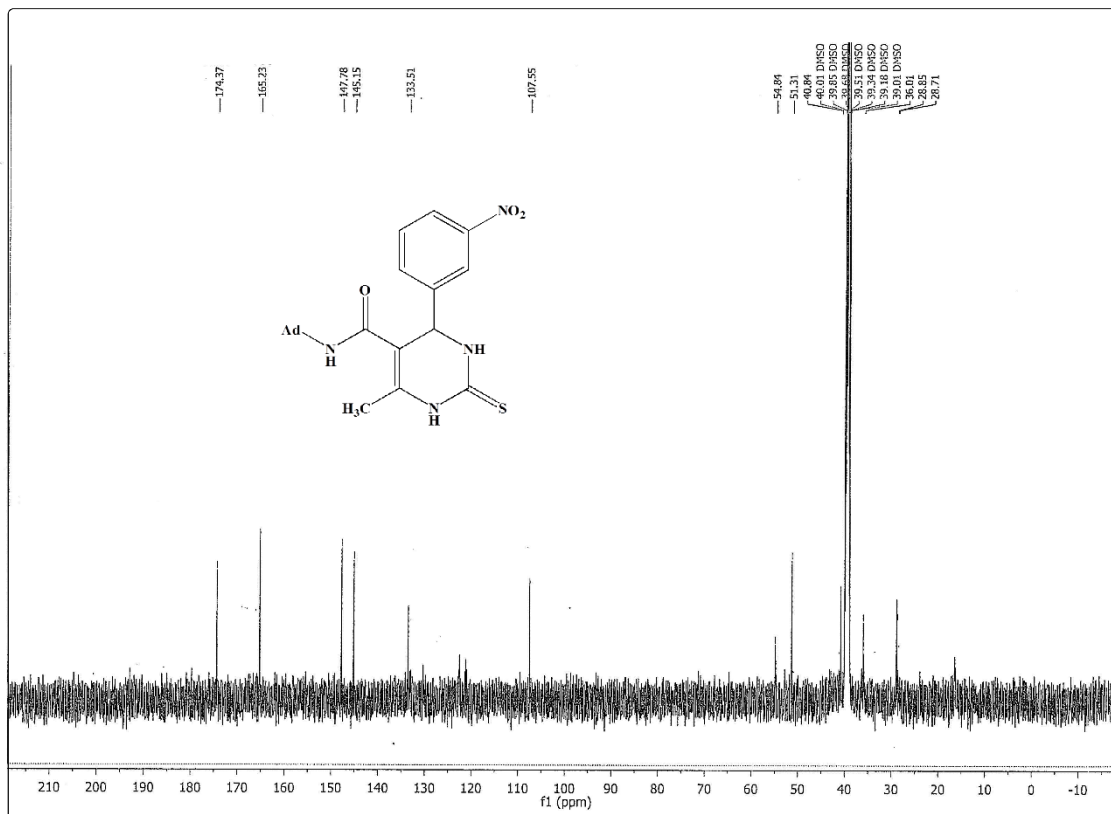

FTIR of 5-(1-adamantylcarbamoyl)-6-methyl-4-(4-nitrophenyl)-3,4-dihydropyrimidin-2(1H)-thione [IIg]

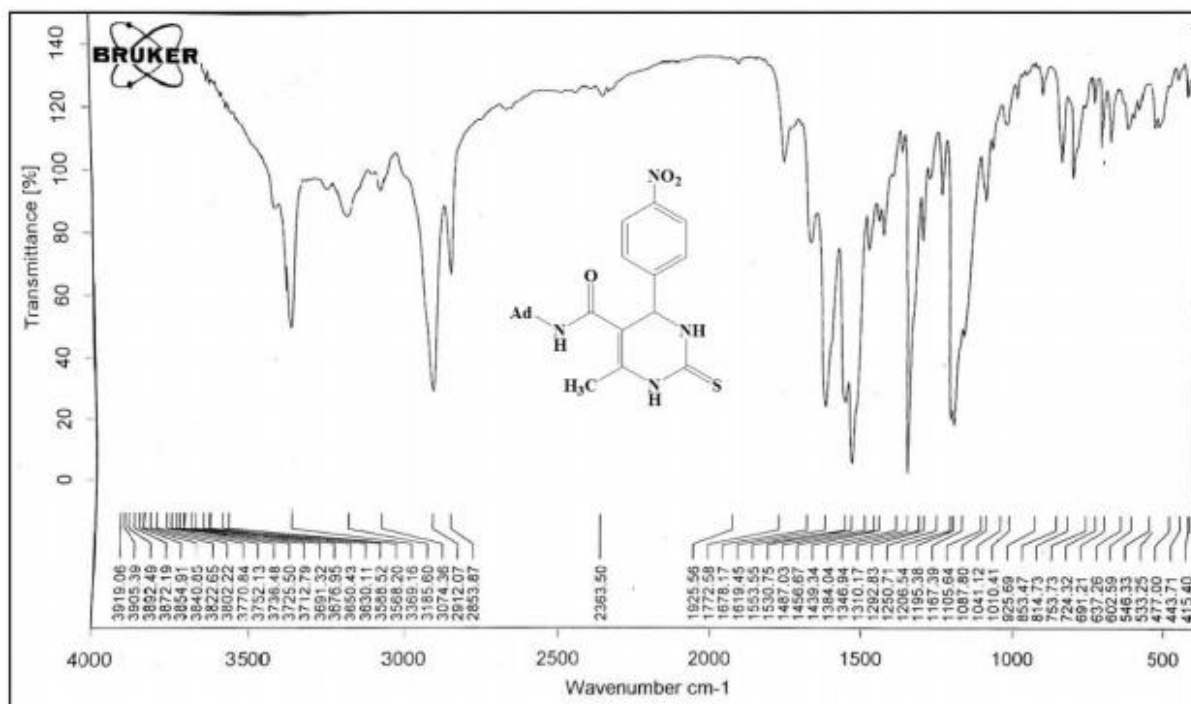

<sup>1</sup>HNMR of 5-(1-adamantylcarbamoyl)-6-methyl-4-(4-nitrophenyl)-3,4-dihydropyrimidin-2(1H)-thione [IIg]

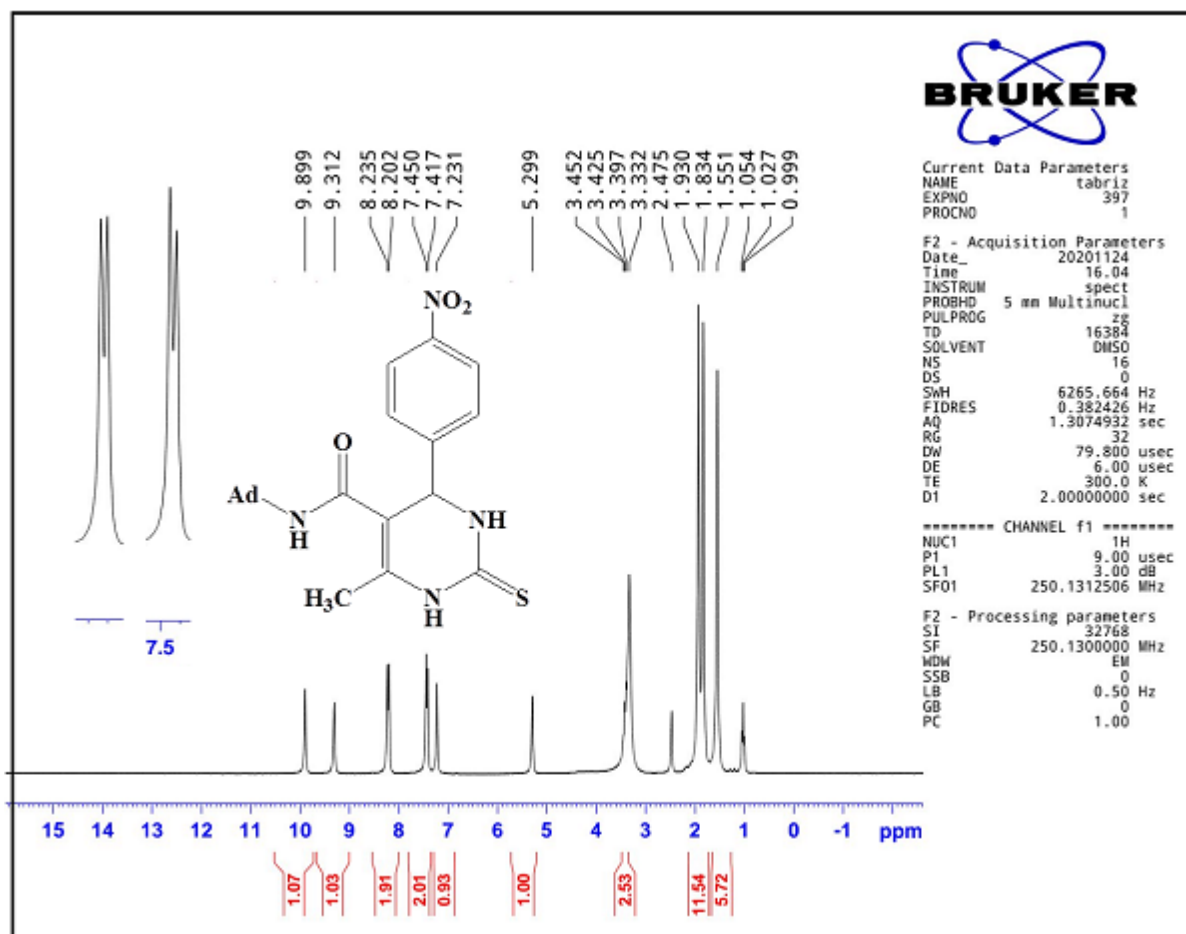

<sup>13</sup>CNMR of 5-(1-adamantylcarbamoyl)-6-methyl-4-(4-nitrophenyl)-3,4-dihydropyrimidin-2(1H)-thione [IIg]

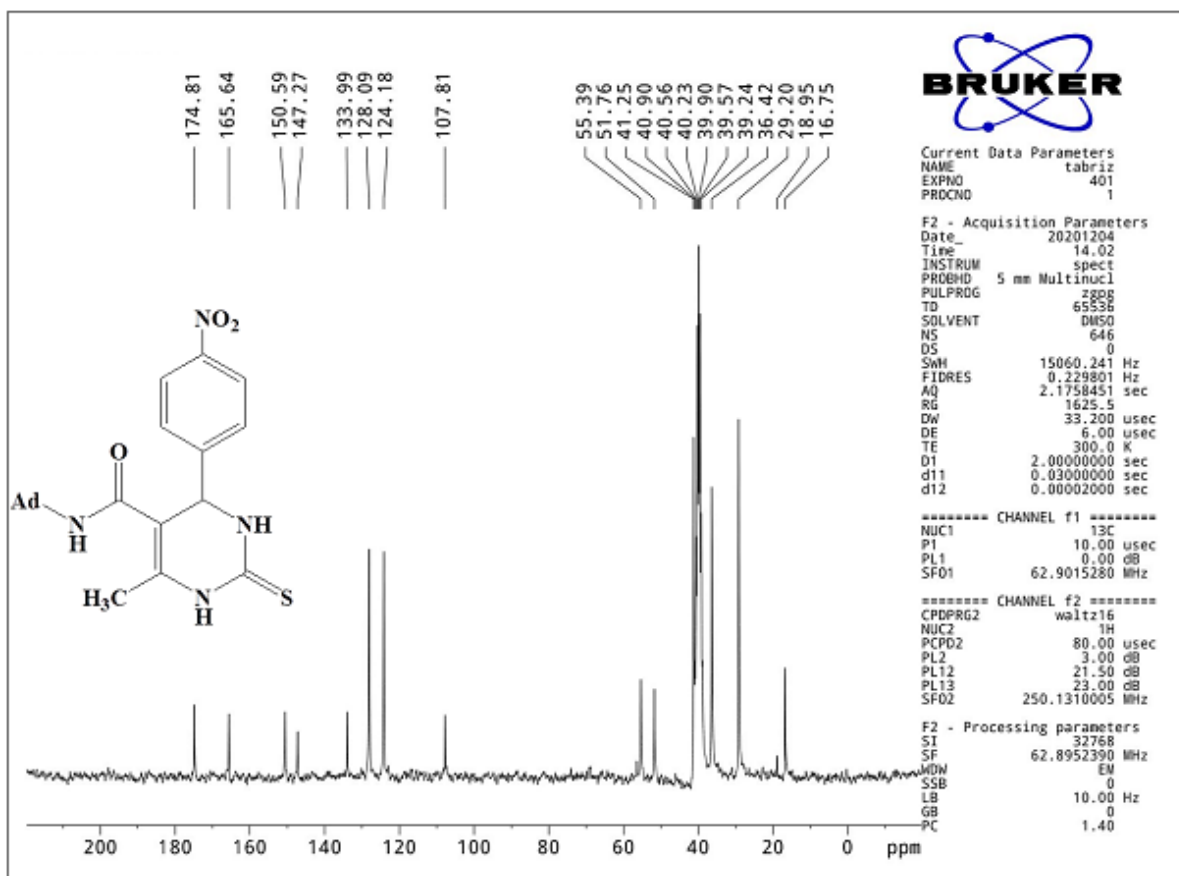

**FTIR of 5-(1-adamantylcarbamoyl)-6-methyl-4-(2-chlorophenyl)-3,4-dihydropyrimidin-2(1H)-thione [IIj]**

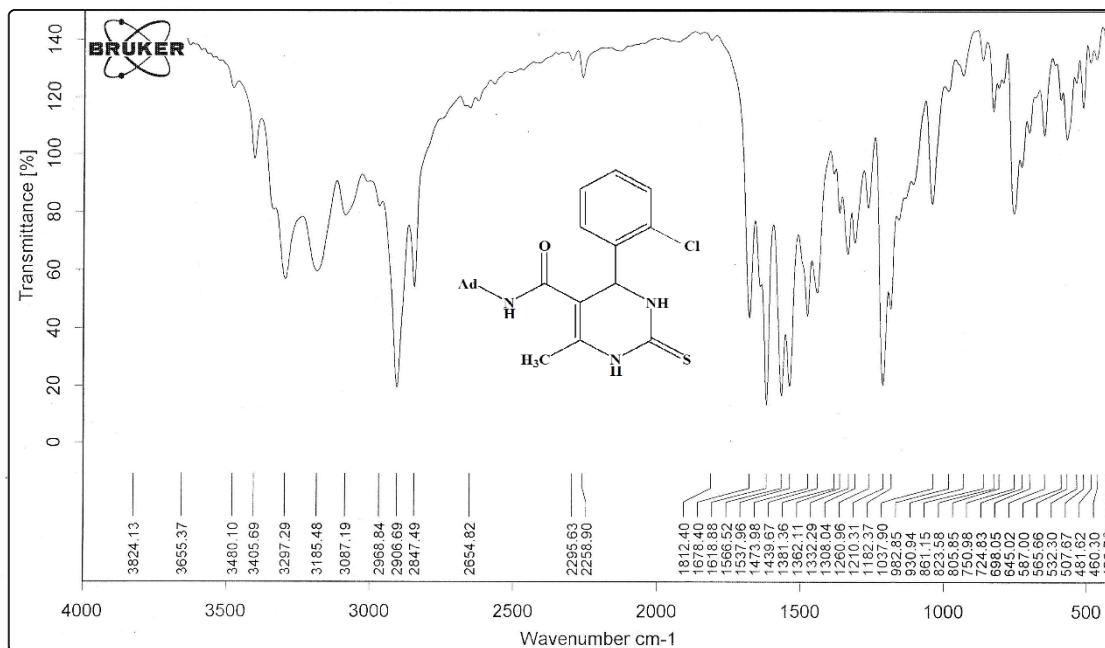

**<sup>1</sup>H NMR of 5-(1-adamantylcarbamoyl)-6-methyl-4-(2-chlorophenyl)-3,4-dihydropyrimidin-2(1H)-thione [IIj]**

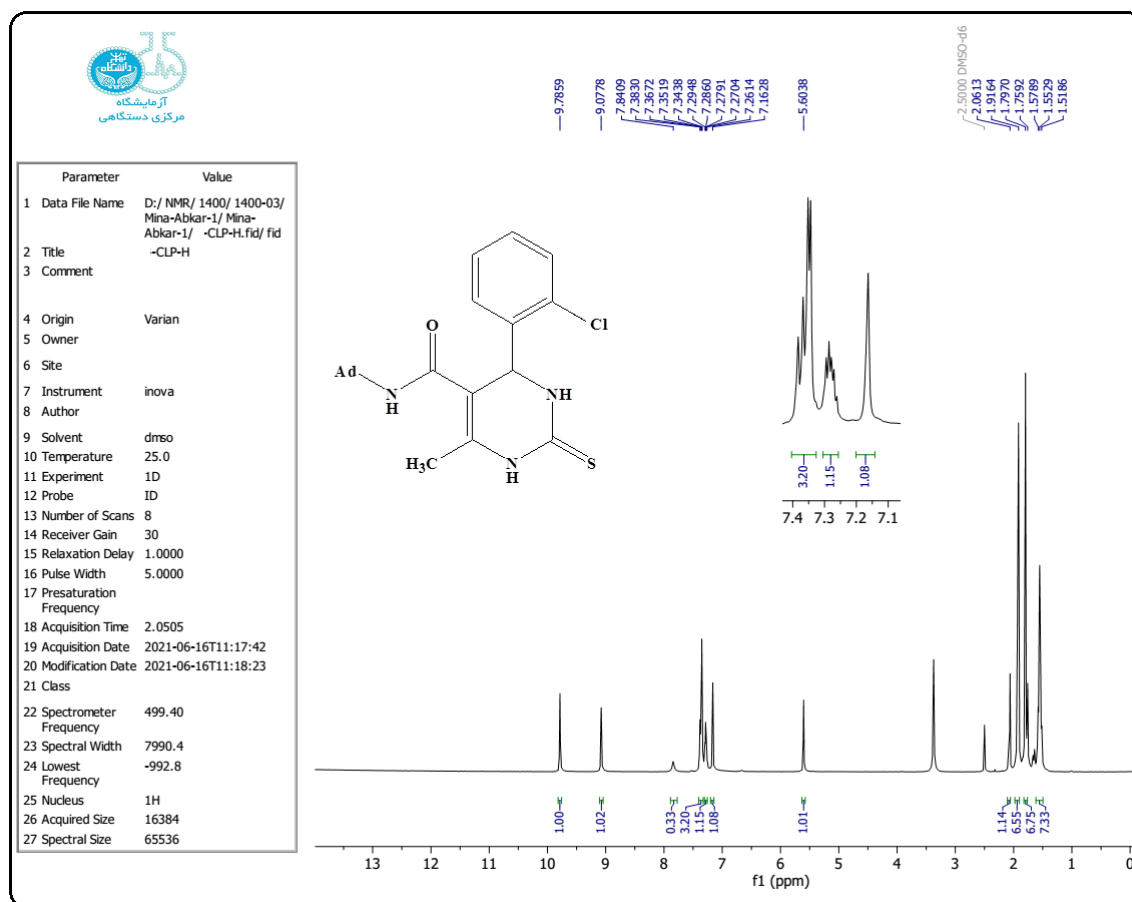

**<sup>13</sup>CNMR of 5-(1-adamantylcarbamoyl)-6-methyl-4-(2-chlorophenyl)-3,4-dihydropyrimidin-2(1H)-thione [IIj]**

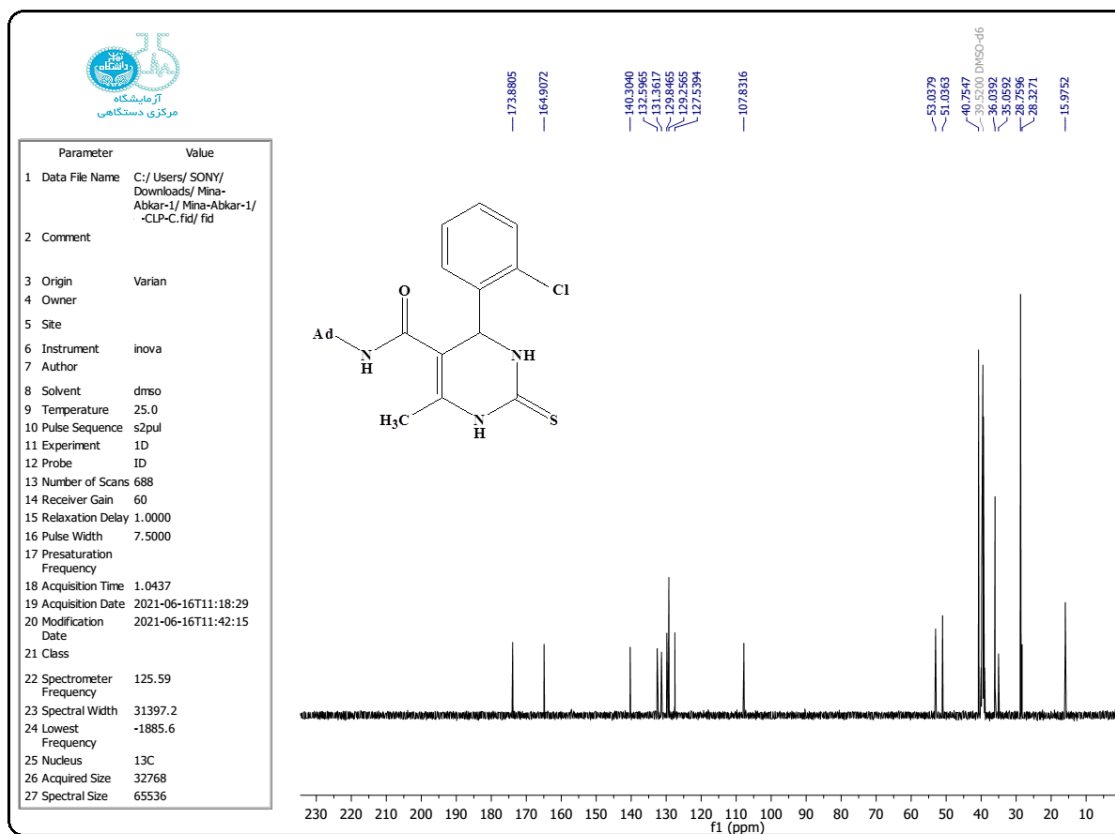

FTIR of 5-(1-adamantylcarbamoyl)-6-methyl-4-(3-chlorophenyl)-3,4-dihydropyrimidin-2(1H)-thione [IIk]

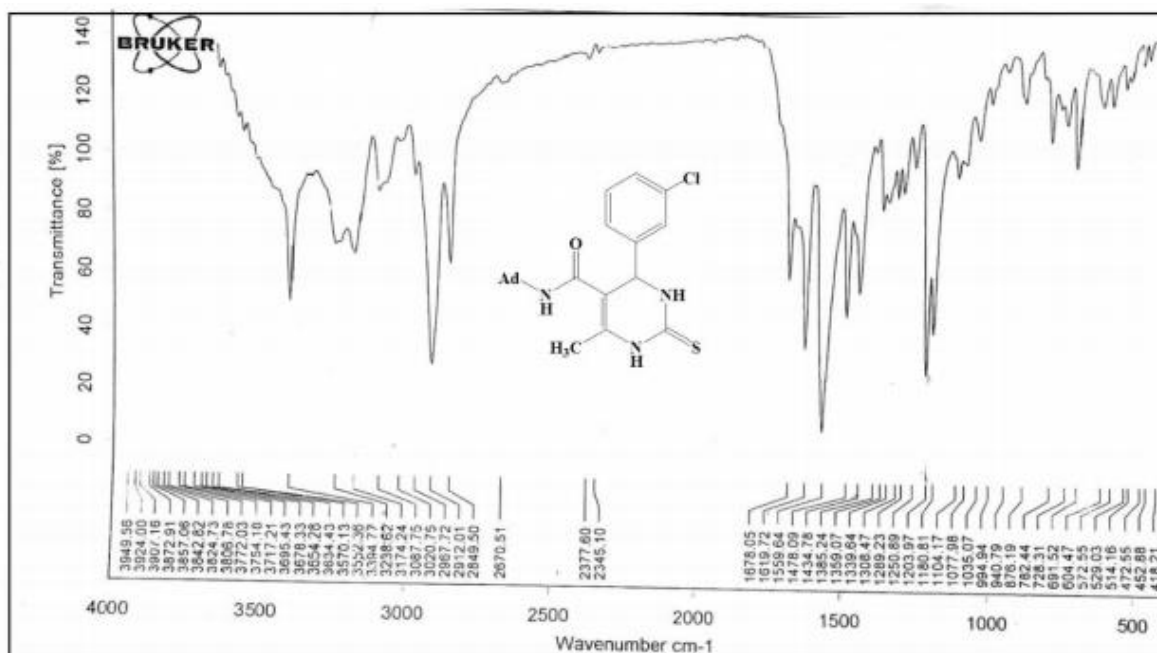

<sup>1</sup>HNMR of 5-(1-adamantylcarbamoyl)-6-methyl-4-(3-chlorophenyl)-3,4-dihydropyrimidin-2(1H)-thione [IIk]

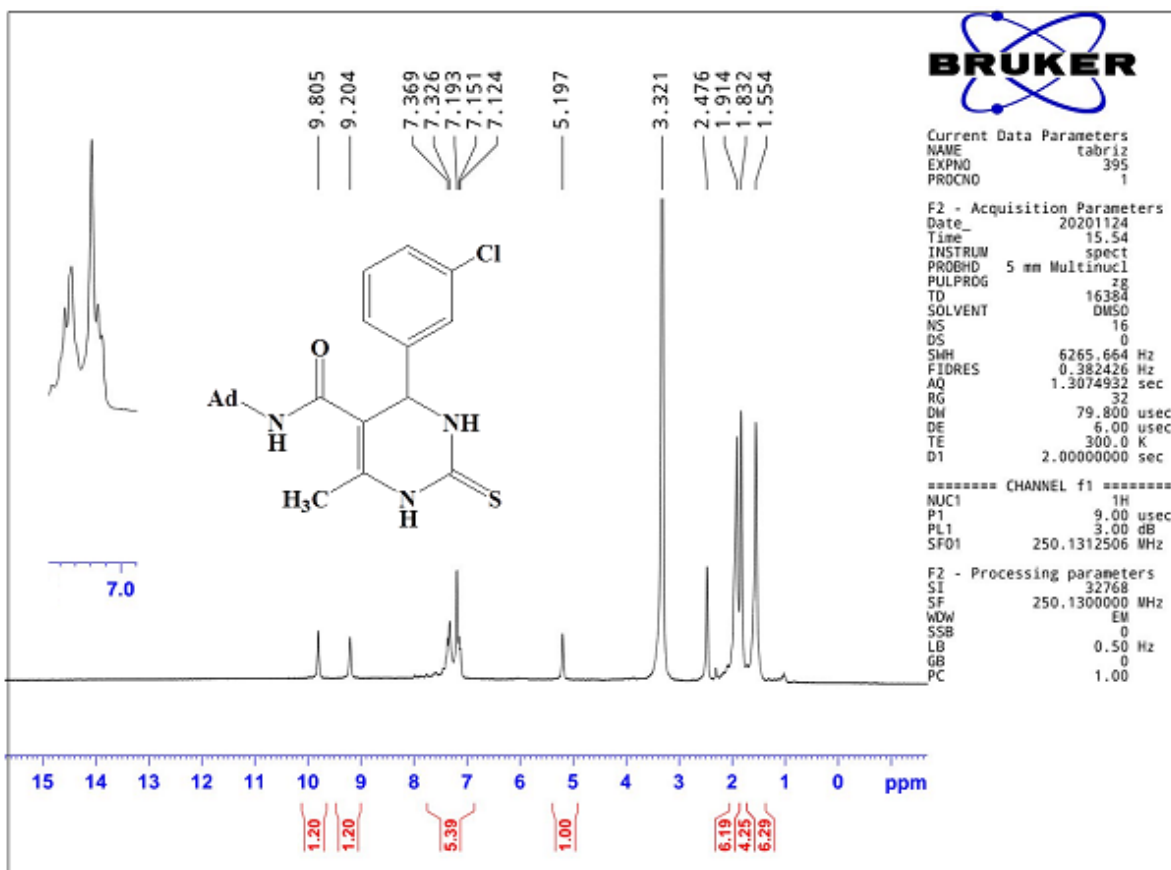



<sup>13</sup>CNMR of 5-(1-adamantylcarbamoyl)-6-methyl-4-(3-chlorophenyl)-3,4-dihydropyrimidin-2(1H)-thione [IIk]

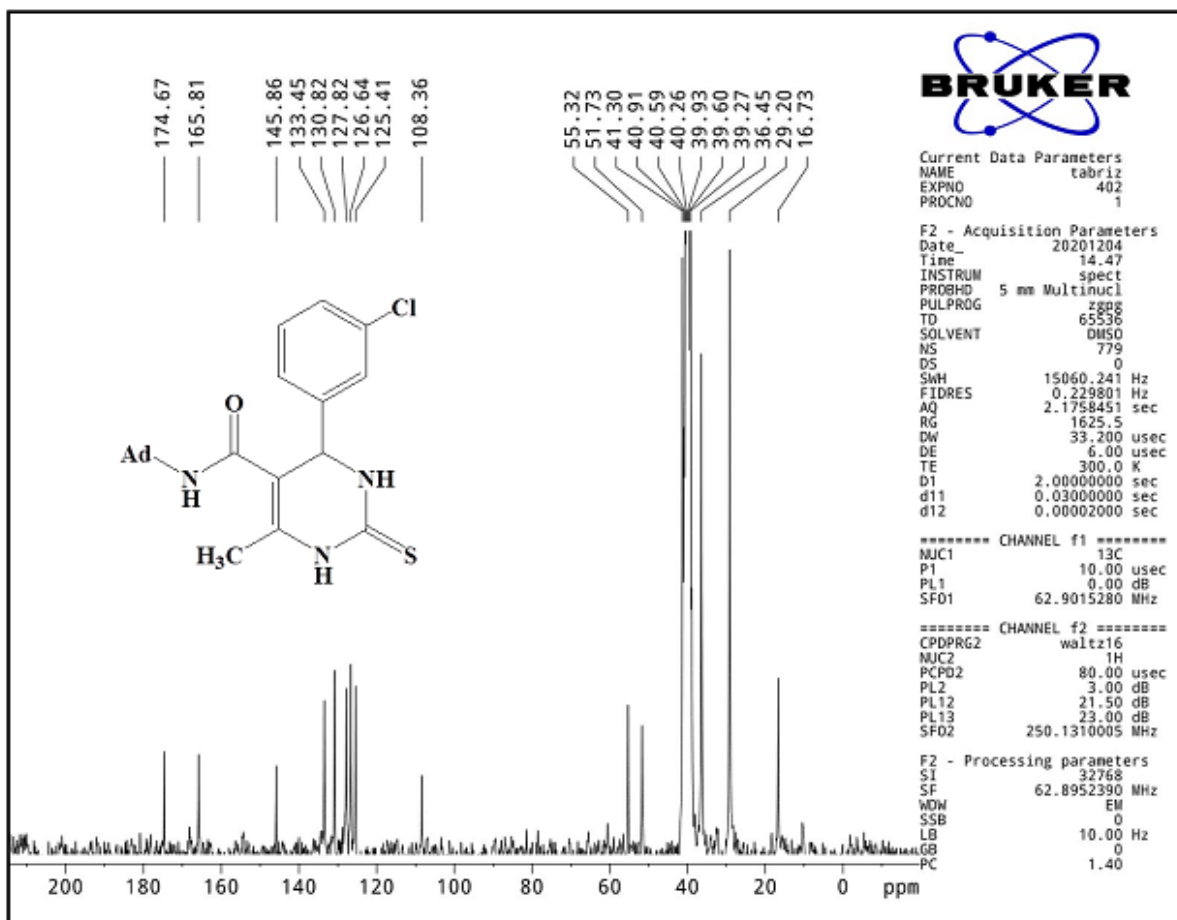

Supplement: d5ra00284b1.pdf [file d5ra00284b1.pdf]
